# Supplementary material for: Cytoplasmic PML promotes TGF-β-associated epithelial–mesenchymal transition and invasion in prostate cancer
Source: PubMed Central journal article supplement — Oncogene. 2015 Nov 9;35(26):3465–75. doi: 10.1038/onc.2015.409 (PMC4932557; doi:10.1038/onc.2015.409), 2015-11-09
Supplement: onc2015409x1.pdf [file onc2015409x1.pdf]

Prostate cancer cases used in TMA:

192

Cases with a PML result: 170

Cases with a CRM1 result: 186

Cases selected with (up to 120 months) survival data

PML: 73

CRM1: 77

Cases with both PML and CRM1 data available: 50

Cases with PML and CRM1 and metastasis data: 40
