# Supplementary material for: Cytoplasmic PML promotes TGF-β-associated epithelial–mesenchymal transition and invasion in prostate cancer
Source: PubMed Central journal article supplement — Oncogene. 2015 Nov 9;35(26):3465–75. doi: 10.1038/onc.2015.409 (PMC4932557; doi:10.1038/onc.2015.409), 2015-11-09
Supplement: onc2015409x4.pdf [file onc2015409x4.pdf]

**Table 1** Patient's characteristics defined by PML/CRM1 protein expression.

| <b>PML/CRM1 Prognostic class</b> |                            |                            |                        |              |
|----------------------------------|----------------------------|----------------------------|------------------------|--------------|
|                                  | <b>PSA 0-9 ng/ml</b>       | <b>PSA 11-19 ng/ml</b>     | <b>PSA&gt;20 ng/ml</b> | <b>Total</b> |
| Good                             | 2                          | 2                          | 7                      | 10           |
| Poor                             | 7                          | 2                          | 31                     | 40           |
|                                  |                            |                            |                        |              |
|                                  | <b>Gleason score &lt;8</b> | <b>Gleason score &gt;8</b> |                        |              |
| Good                             | 3                          | 8                          |                        | 11           |
| Poor                             | 11                         | 28                         |                        | 39           |
|                                  |                            |                            |                        |              |
|                                  | <b>Metastasis absent</b>   | <b>Metastasis present</b>  |                        |              |
| Good                             | 2                          | 7                          |                        | 9            |
| Poor                             | 4                          | 27                         |                        | 31           |

**Table 2** Different PML/CRM1 protein expression patterns were used to classify patients with prostate cancer. A poor prognostic group was defined by membership to Class 1, 5, or 7.

| <b>PML Nuclear</b> | <b>PML Cytoplasmic</b> | <b>CRM1 Cytoplasmic</b> | <b>Class</b> |
|--------------------|------------------------|-------------------------|--------------|
| 1                  | 1                      | 1                       | 1            |
| 1                  | 0                      | 0                       | 2            |
| 1                  | 0                      | 1                       | 3            |
| 1                  | 1                      | 0                       | 4            |
| 0                  | 1                      | 1                       | 5            |
| 0                  | 0                      | 1                       | 6            |
| 0                  | 0                      | 0                       | 7            |
