# Supplementary figures and images for: Cytoplasmic PML promotes TGF-β-associated epithelial–mesenchymal transition and invasion in prostate cancer
Source: PubMed Central journal article supplement — Oncogene. 2015 Nov 9;35(26):3465–75. doi: 10.1038/onc.2015.409 (PMC4932557; doi:10.1038/onc.2015.409), 2015-11-09

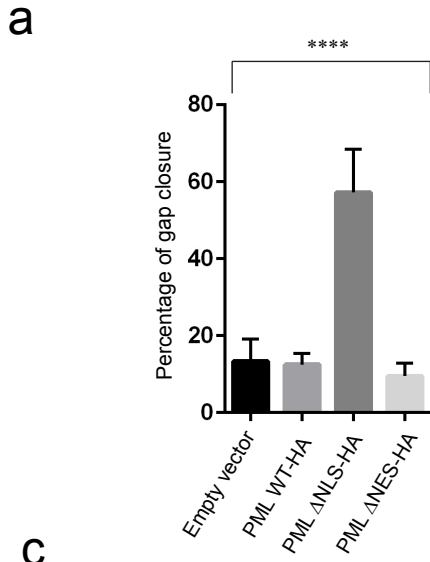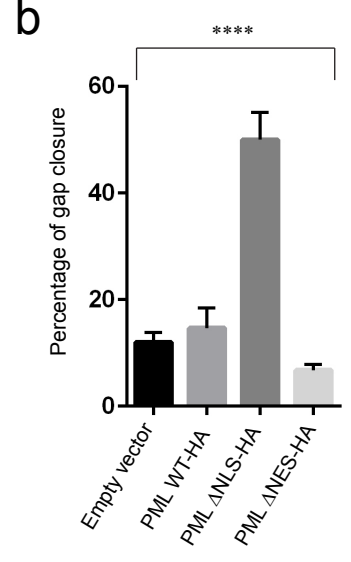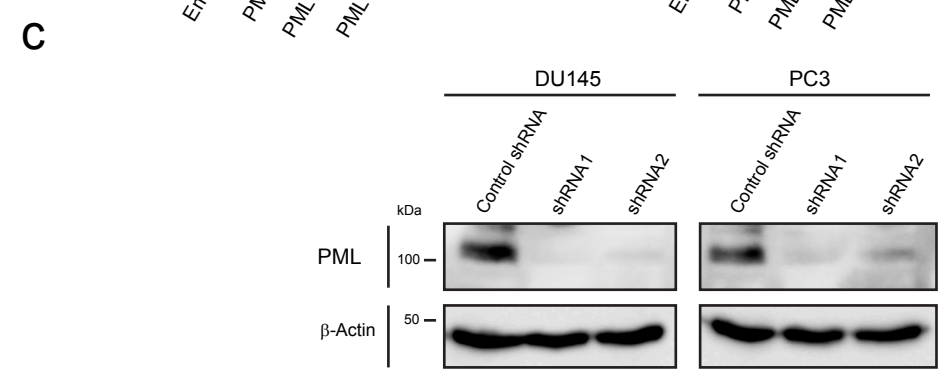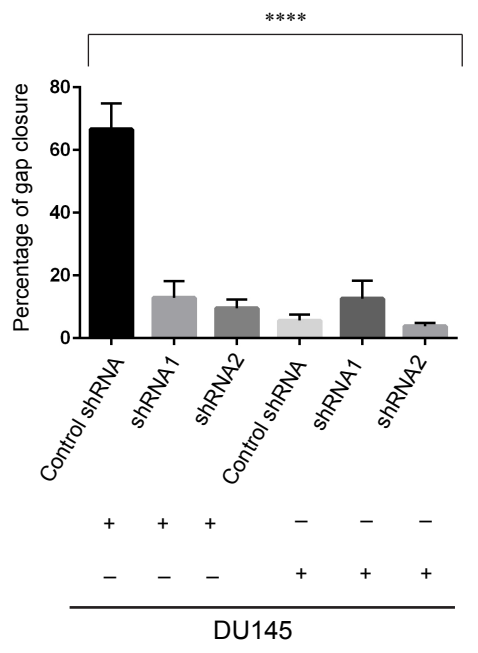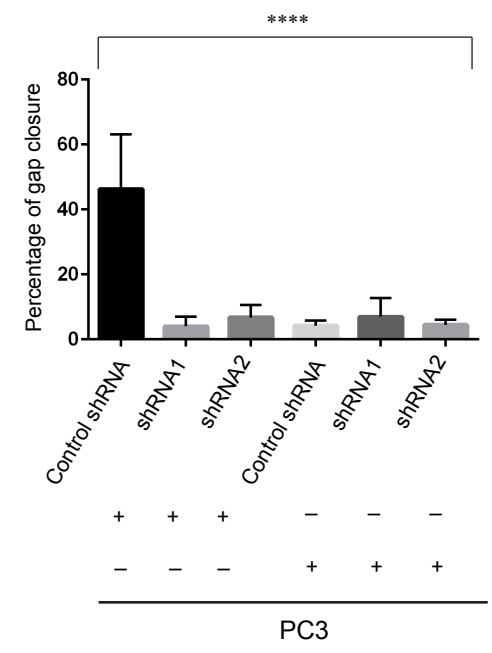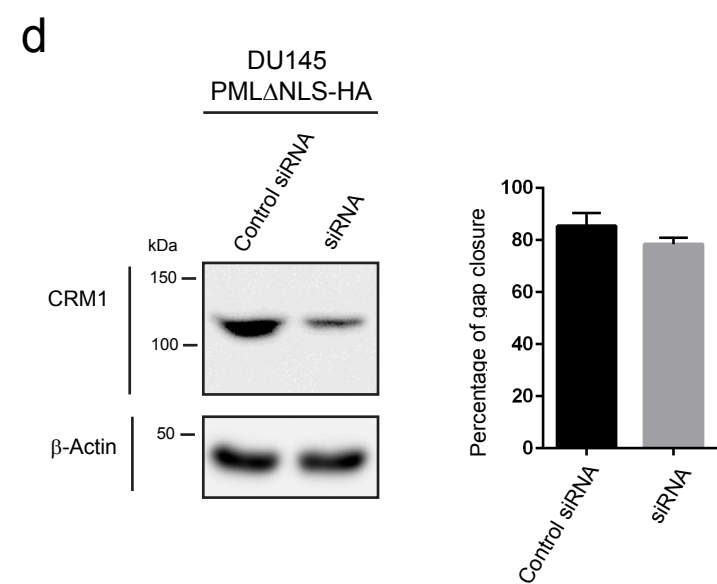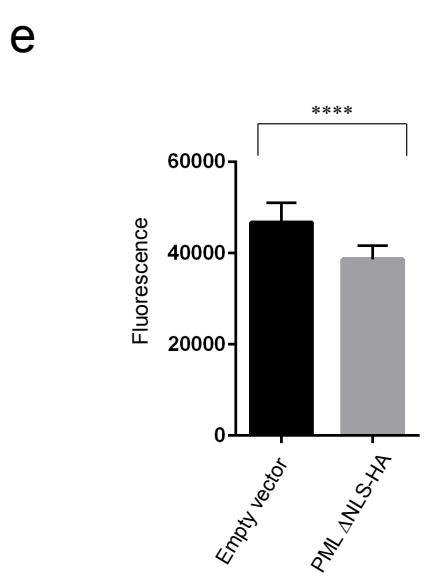

Supplement: onc2015409x2.pdf [file onc2015409x2.pdf]

**a**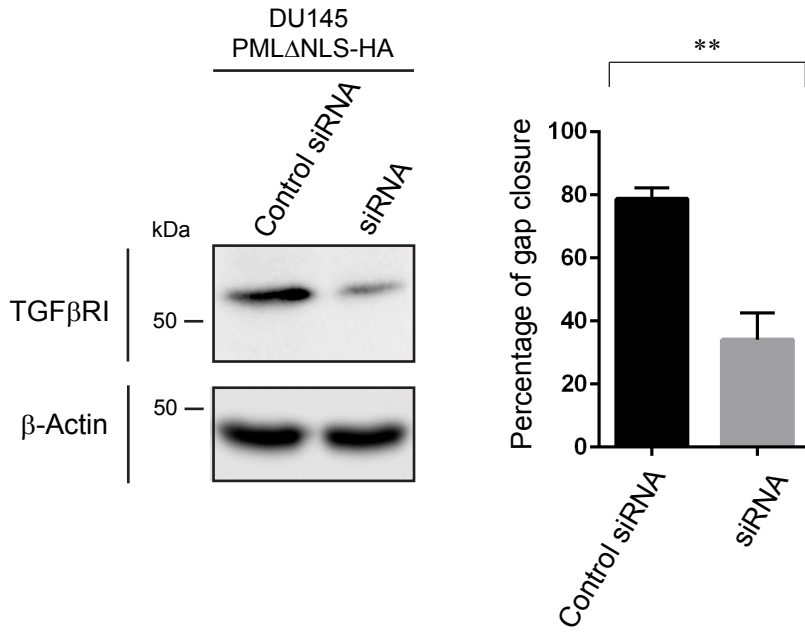**b**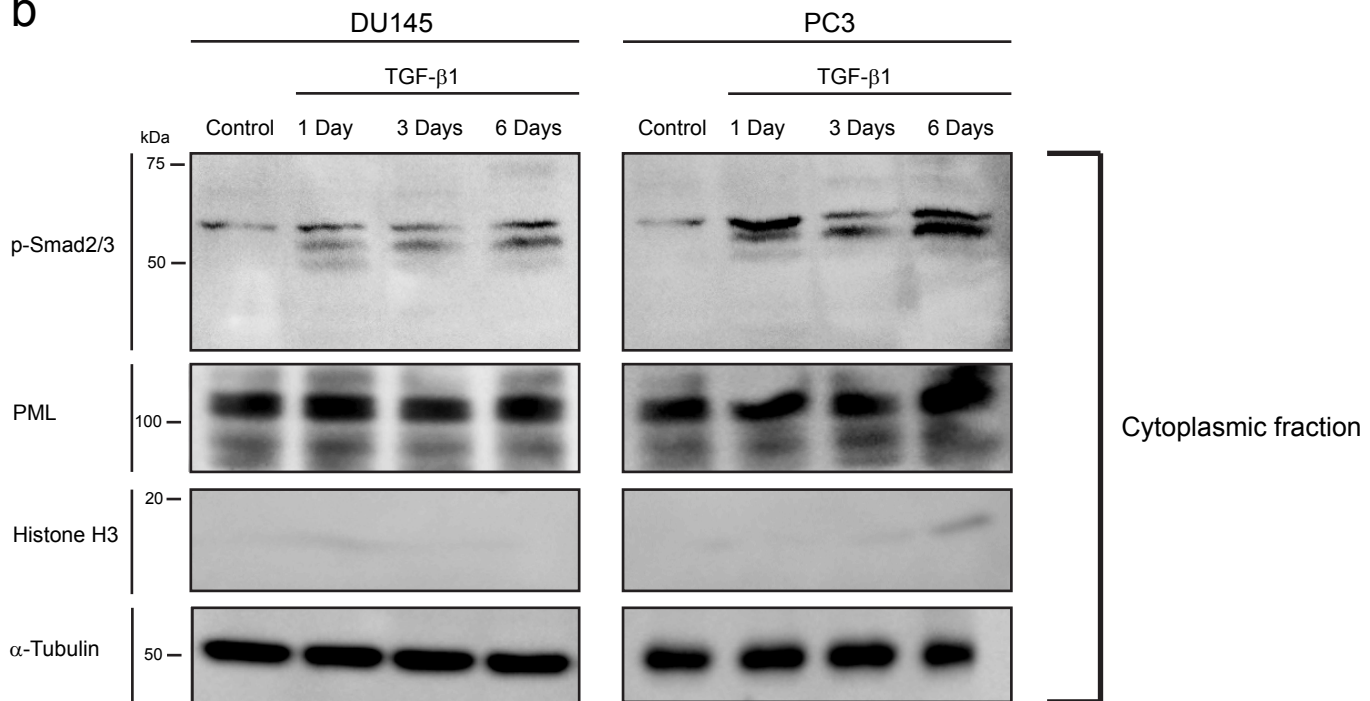**c**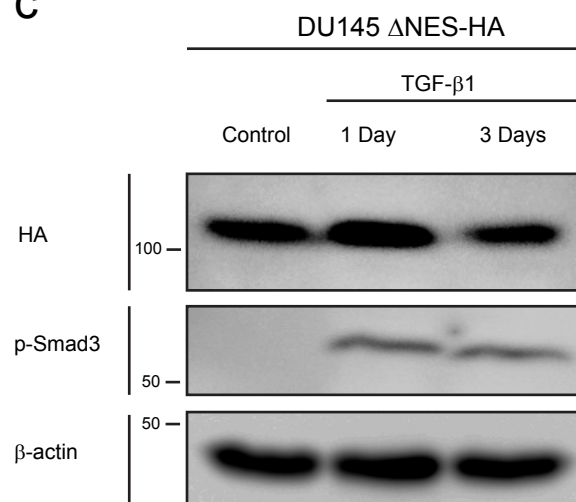**d**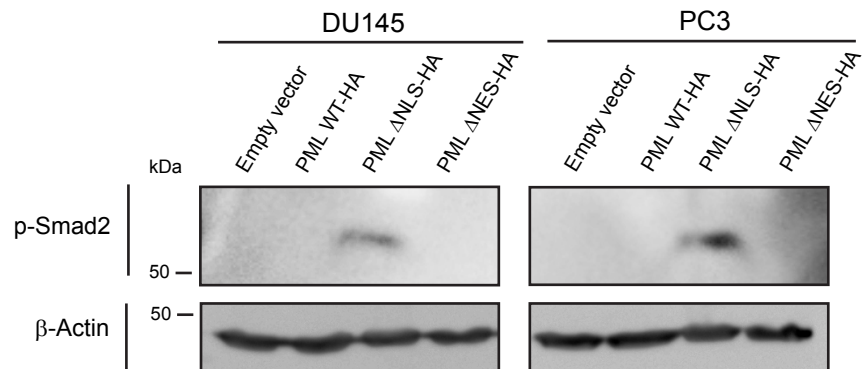

Supplement: onc2015409x3.pdf [file onc2015409x3.pdf]
